# Supplementary material
Source: PubMed Central journal article supplement (PMC6417828)
Supplement: NIHMS999825-supplement-2.pdf [file NIHMS999825-supplement-2.pdf]

Supplemental materials for: **Leveraging summary statistics to make inferences about complex phenotypes in large biobanks**

**Supplement 1:**

*Slope proof:*

Background/notation:

$$\begin{aligned} \mathbf{y}_1 &= \hat{\beta}_1 \mathbf{x} + \hat{\alpha}_1 \\ &\vdots \\ \mathbf{y}_n &= \hat{\beta}_n \mathbf{x} + \hat{\alpha}_n \\ \mathbf{y}_c &= c_1 \mathbf{y}_1 + c_2 \mathbf{y}_2 + \dots + c_n \mathbf{y}_n \\ \hat{\mathbf{y}}_c &= \hat{\beta}_c \mathbf{x} + \hat{\alpha} \end{aligned}$$

Proof by mathematical induction for  $\hat{\beta}$

Formula:

For any  $n \in \mathbb{N}$ ,

$$\hat{\beta}_c = c_1 \hat{\beta}_1 + c_2 \hat{\beta}_2 + \dots + c_n \hat{\beta}_n$$

Base case  $n = 2$ , if  $n = 2$ :

$$\text{Prove } \hat{\beta} = c_1 \hat{\beta}_1 + c_2 \hat{\beta}_2$$

$$\begin{aligned} \hat{\beta} &= \frac{\sum_{i=1}^n (x_i - \bar{x})(y_i - \bar{y})}{\sum_{i=1}^n (x_i - \bar{x})^2} \\ \hat{\beta}_1 &= \frac{\sum_{i=1}^n (x_i - \bar{x})(c_1 y_{1i} - c_1 \bar{y}_1)}{\sum_{i=1}^n (x_i - \bar{x})^2} \quad \hat{\beta}_2 = \frac{\sum_{i=1}^n (x_i - \bar{x})(c_2 y_{2i} - c_2 \bar{y}_2)}{\sum_{i=1}^n (x_i - \bar{x})^2} \\ \mathbf{y}_c &= \mathbf{y}_1 + \mathbf{y}_2 \\ \hat{\beta}_c (c_1 \mathbf{y}_1 + c_2 \mathbf{y}_2) &= \frac{\sum_{i=1}^n (x_i - \bar{x})((c_1 y_{1i} + c_2 y_{2i}) - (c_1 \bar{y}_1 + c_2 \bar{y}_2))}{\sum_{i=1}^n (x_i - \bar{x})^2} \\ &= \frac{\sum_{i=1}^n c_1 (x_i - \bar{x})(y_{1i} - \bar{y}_1) + c_2 (x_i - \bar{x})(y_{2i} - \bar{y}_2)}{\sum_{i=1}^n (x_i - \bar{x})^2} \end{aligned}$$

By rearranging the y terms and constants, which is equivalent to  $c_1 \hat{\beta}_1 + c_2 \hat{\beta}_2$

Inductive hypothesis:

Assume that  $\hat{\beta}_c(c_1\mathbf{y}_1 + c_2\mathbf{y}_2 + \cdots + c_k\mathbf{y}_k) = c_1\hat{\beta}_1 + c_2\hat{\beta}_2 + \cdots + c_k\hat{\beta}_k$  for each  $k < n$

We wish to show that  $\hat{\beta}_c(T + c_{k+1}\mathbf{y}_{k+1}) = \hat{\beta}_c(c_1\mathbf{y}_1 + c_2\mathbf{y}_2 + \cdots + c_k\mathbf{y}_k + c_{k+1}\mathbf{y}_{k+1})$  where  $T = c_1\mathbf{y}_1 + c_2\mathbf{y}_2 + \cdots + c_k\mathbf{y}_k$

By base case:

$$\hat{\beta}_c(T + c_{k+1}\mathbf{y}_{k+1}) = \hat{\beta}_T + c_{k+1}\hat{\beta}_{k+1}$$

By induction hypothesis:

$$\hat{\beta}_c(T + \mathbf{y}_{k+1}) = c_1\hat{\beta}_1 + c_2\hat{\beta}_2 + \cdots + c_k\hat{\beta}_k + c_{k+1}\hat{\beta}_{k+1} \quad \blacksquare$$

## Supplement 2:

### Intercept proof:

Proof by Mathematical induction for  $\hat{\alpha}$

Formula:

For any  $n \in \mathbb{N}$ ,

$$\hat{\alpha}_c = c_1\hat{\alpha}_1 + c_2\hat{\alpha}_2 + \cdots + c_n\hat{\alpha}_n$$

Base case  $n = 2$ , if  $n = 2$ :

Want to show:  $\hat{\alpha}_c = c_1\hat{\alpha}_1 + c_2\hat{\alpha}_2$

$$\hat{\alpha} = \bar{y} - \hat{\beta}\bar{x}$$

$$\mathbf{y}_c = c_1\mathbf{y}_1 + c_2\mathbf{y}_2$$

$$\hat{\alpha}_1 = \bar{y}_1 - \hat{\beta}_1\bar{x} \quad \hat{\alpha}_2 = \bar{y}_2 - \hat{\beta}_2\bar{x}$$

Already shown above that  $\hat{\beta}_c = c_1\hat{\beta}_1 + c_2\hat{\beta}_2$  so:

$$\begin{aligned}\hat{\alpha}_c &= (c_1\bar{y}_1 + c_2\bar{y}_2) - (c_1\hat{\beta}_1 + c_2\hat{\beta}_2)\bar{x} \\ &= c_1\bar{y}_1 - c_1\hat{\beta}_1\bar{x} + c_2\bar{y}_2 - c_2\hat{\beta}_2\bar{x}\end{aligned}$$

By rearranging the terms, this is equivalent to  $c_1\hat{\alpha}_1 + c_2\hat{\alpha}_2$

Induction hypothesis: Assume

$$\hat{\alpha}_c(c_1\mathbf{y}_1 + c_2\mathbf{y}_2 + \cdots + c_k\mathbf{y}_k) = c_1\hat{\alpha}_1 + c_2\hat{\alpha}_2 + \cdots + c_k\hat{\alpha}_k \text{ where } T = c_1\mathbf{y}_1 + c_2\mathbf{y}_2 + \cdots + c_k\mathbf{y}_k$$

Induction step:

Want to show  $\hat{\alpha}_c(T + c_{k+1}\mathbf{y}_{k+1}) = \hat{\alpha}_c(c_1\mathbf{y}_1 + c_2\mathbf{y}_2 + \cdots + c_k\mathbf{y}_k + c_{k+1}\mathbf{y}_{k+1})$  where  $T = c_1\mathbf{y}_1 + c_2\mathbf{y}_2 + \cdots + c_k\mathbf{y}_k$

By base case:

$$\hat{\alpha}_c(T + c_{k+1}\mathbf{y}_{k+1}) = \hat{\alpha}_T + \widehat{\alpha_{k+1}}$$

By assumption:

$$\hat{\alpha}_c(T + c_{k+1}\mathbf{y}_{k+1}) = c_1\hat{\alpha}_1 + c_2\hat{\alpha}_2 + \cdots + c_k\hat{\alpha}_k + c_{k+1}\hat{\alpha}_{k+1} \quad \blacksquare$$

### Supplement 3:

#### Standard Error proof for the linear combination of two phenotypes:

We wish to show that

$$SE(\hat{\beta}_c) = \sqrt{c_1^2 SE(\hat{\beta}_1)^2 + c_2^2 SE(\hat{\beta}_2)^2 + \frac{2}{n-2} \left( \frac{c_1 c_2 \text{cov}(y_1, y_2)}{\text{var}(x)} - c_1 c_2 \hat{\beta}_1 \hat{\beta}_2 \right)}$$

Where  $y_c = c_1 y_1 + c_2 y_2$  and  $\hat{y}_c = \hat{\beta}_c x_j + \hat{\alpha}_c$ .

We begin with the formula for standard error.

$$SE(\hat{\beta}_c) = \frac{\sqrt{\frac{\sum_{j=1}^n (y_{cj} - \hat{y}_{cj})^2}{n-2}}}{\sqrt{\sum_{j=1}^n (x_j - \bar{x})^2}}$$

We can substitute  $c_1 y_{1j} + c_2 y_{2j}$  for  $y_{cj}$  and  $(c_1 \hat{\beta}_1 + c_2 \hat{\beta}_2)x_j + (c_1 \hat{\alpha}_1 + c_2 \hat{\alpha}_2)$  for  $\hat{y}_c$ .

$$SE(\hat{\beta}_c) = \sqrt{\frac{\sum_{j=1}^n ((c_1 y_{1j} + c_2 y_{2j}) - ((c_1 \hat{\beta}_1 + c_2 \hat{\beta}_2)x_j + (c_1 \hat{\alpha}_1 + c_2 \hat{\alpha}_2)))^2}{(n-2) \sum_{j=1}^n (x_j - \bar{x})^2}}$$

We now substitute  $\hat{y}_{ij}$  for  $\hat{\beta}_i x_j + \hat{\alpha}_i$ .

$$SE(\hat{\beta}_c) = \sqrt{\frac{\sum_{j=1}^n ((c_1 y_{1j} - c_1 \hat{y}_{1j}) + (c_2 y_{2j} - c_2 \hat{y}_{2j}))^2}{(n-2) \sum_{j=1}^n (x_j - \bar{x})^2}}$$

$$SE(\hat{\beta}_c) = \sqrt{\frac{c_1^2 \sum_{j=1}^n (y_{1j} - \hat{y}_{1j})^2 + 2c_1 c_2 \sum_{j=1}^n (y_{1j} - \hat{y}_{1j})(y_{2j} - \hat{y}_{2j}) + c_2^2 \sum_{j=1}^n (y_{2j} - \hat{y}_{2j})^2}{(n-2) \sum_{j=1}^n (x_j - \bar{x})^2}}$$

We can substitute  $SE(\hat{\beta}_i)^2$  for  $\frac{\sum_{j=1}^n (y_{ij} - \hat{y}_{ij})^2}{(n-2) \sum_{j=1}^n (x_j - \bar{x})^2}$ .

$$SE(\hat{\beta}_c) = \sqrt{c_1^2 SE(\hat{\beta}_1)^2 + c_2^2 SE(\hat{\beta}_2)^2 + \frac{2c_1 c_2 \sum_{j=1}^n (y_{1j} - \hat{y}_{1j})(y_{2j} - \hat{y}_{2j})}{(n-2) \sum_{j=1}^n (x_j - \bar{x})^2}}$$

$$SE(\hat{\beta}_c) = \sqrt{c_1^2 SE(\hat{\beta}_1)^2 + c_2^2 SE(\hat{\beta}_2)^2 + \frac{2c_1 c_2 \sum_{j=1}^n (y_{1j} y_{2j} - y_{1j} \hat{y}_{2j} - y_{2j} \hat{y}_{1j} + \hat{y}_{1j} \hat{y}_{2j})}{(n-2) \sum_{j=1}^n (x_j - \bar{x})^2}}$$

Next,  $\hat{y}_{ij}$  is replaced by  $\hat{\beta}_i x_j + \hat{\alpha}_i$ .

$$SE(\hat{\beta}_c) = \sqrt{c_1^2 SE(\hat{\beta}_1)^2 + c_2^2 SE(\hat{\beta}_2)^2 + \frac{2c_1 c_2 \sum_{j=1}^n (y_{1j} y_{2j} - y_{1j}(\hat{\beta}_2 x_j + \hat{\alpha}_2) - y_{2j}(\hat{\beta}_1 x_j + \hat{\alpha}_1) + (\hat{\beta}_1 x_j + \hat{\alpha}_1)(\hat{\beta}_2 x_j + \hat{\alpha}_2))}{(n-2) \sum_{j=1}^n (x_j - \bar{x})^2}}$$

$$SE(\hat{\beta}_c) = \sqrt{c_1^2 SE(\hat{\beta}_1)^2 + c_2^2 SE(\hat{\beta}_2)^2 + \frac{2c_1 c_2 \sum_{j=1}^n (y_{1j} y_{2j} - \hat{\beta}_2 x_j y_{1j} - \hat{\alpha}_2 y_{1j} - \hat{\beta}_1 x_j y_{2j} - \hat{\alpha}_1 y_{2j} + \hat{\beta}_1 \hat{\beta}_2 x_j^2 + \hat{\alpha}_2 \hat{\beta}_1 x_j + \hat{\alpha}_1 \hat{\beta}_2 x_j + \hat{\alpha}_1 \hat{\alpha}_2)}{(n-2) \sum_{j=1}^n (x_j - \bar{x})^2}}$$

We now substitute  $\bar{y}_i - \hat{\beta}_i \bar{x}$  for  $\hat{\alpha}_i$  and rearrange the terms.

$$SE(\hat{\beta}_c) = \sqrt{c_1^2 SE(\hat{\beta}_1)^2 + c_2^2 SE(\hat{\beta}_2)^2 + \frac{2c_1 c_2 \sum_{j=1}^n (y_{1j} y_{2j} - \hat{\beta}_2 x_j y_{1j} - (\bar{y}_2 - \hat{\beta}_2 \bar{x}) y_{1j} - \hat{\beta}_1 x_j y_{2j} - (\bar{y}_1 - \hat{\beta}_1 \bar{x}) y_{2j} + \hat{\beta}_1 \hat{\beta}_2 x_j^2 + (\bar{y}_2 - \hat{\beta}_2 \bar{x}) \hat{\beta}_1 x_j + (\bar{y}_1 - \hat{\beta}_1 \bar{x}) \hat{\beta}_2 x_j + (\bar{y}_1 - \hat{\beta}_1 \bar{x})(\bar{y}_2 - \hat{\beta}_2 \bar{x}))}{(n-2) \sum_{j=1}^n (x_j - \bar{x})^2}}$$

$$SE(\hat{\beta}_c) = \sqrt{c_1^2 SE(\hat{\beta}_1)^2 + c_2^2 SE(\hat{\beta}_2)^2 + \frac{2c_1 c_2}{n-2} \left( \frac{\sum_{j=1}^n (y_{1j} - \bar{y}_1)(y_{2j} - \bar{y}_2)}{\sum_{j=1}^n (x_j - \bar{x})^2} - \hat{\beta}_1 \frac{\sum_{j=1}^n (x_j - \bar{x})(y_{2j} - \bar{y}_2)}{\sum_{j=1}^n (x_j - \bar{x})^2} - \hat{\beta}_2 \frac{\sum_{j=1}^n (x_j - \bar{x})(y_{1j} - \bar{y}_1)}{\sum_{j=1}^n (x_j - \bar{x})^2} + \hat{\beta}_1 \hat{\beta}_2 \frac{\sum_{j=1}^n (x_j - \bar{x})^2}{\sum_{j=1}^n (x_j - \bar{x})^2} \right)}$$

This simplifies to

$$SE(\hat{\beta}_c) = \sqrt{c_1^2 SE(\hat{\beta}_1)^2 + c_2^2 SE(\hat{\beta}_2)^2 + \frac{2c_1 c_2}{n-2} \left( \frac{\text{cov}(y_1, y_2)}{\text{var}(x)} - \hat{\beta}_1 \hat{\beta}_2 \right)} \quad \blacksquare$$

## Supplement 4:

### Standard Error proof for the linear combination of $m$ phenotypes:

We want to show that

$$SE(c_1\hat{\beta}_1 + c_2\hat{\beta}_2 + \dots + c_w\hat{\beta}_w) = \sqrt{\left(\sum_{i=1}^m c_i^2 SE(\hat{\beta}_i)^2\right) + \frac{2}{n-2} \left( \frac{\sum_{q=1}^{m-1} \sum_{r=q+1}^m c_q * c_r * \text{cov}(\mathbf{y}_q, \mathbf{y}_r)}{\text{var}(x)} - \left( \sum_{q=1}^{m-1} \sum_{r=q+1}^m c_q \hat{\beta}_q c_r \hat{\beta}_r \right) \right)}$$

We have already shown that this formula holds for  $w = 2$ , and we wish to show that it holds for all values of  $w$ . We will prove this using mathematical induction.

First we assume that our formula is true. We want to show that the following is true:

$$SE(c_1\hat{\beta}_1 + c_2\hat{\beta}_2 + \dots + c_w\hat{\beta}_w + c_{w+1}\hat{\beta}_{w+1}) = \sqrt{\left(\sum_{i=1}^{w+1} c_i^2 SE(\hat{\beta}_i)^2\right) + \frac{2}{n-2} \left( \frac{\sum_{q=1}^w \sum_{r=q+1}^{w+1} c_q * c_r * \text{cov}(\mathbf{y}_q, \mathbf{y}_r)}{\text{var}(x)} - \left( \sum_{q=1}^w \sum_{r=q+1}^{w+1} c_q \hat{\beta}_q c_r \hat{\beta}_r \right) \right)}$$

We will let  $\mathbf{y}_T = c_1\mathbf{y}_1 + c_2\mathbf{y}_2 + \dots + c_w\mathbf{y}_w$  and  $y_T = \hat{\beta}_T x + \hat{\alpha}_T$ . By what we have already shown, we know that  $\hat{\beta}_T = c_1\hat{\beta}_1 + c_2\hat{\beta}_2 + \dots + c_w\hat{\beta}_w$  and  $\hat{\alpha}_T = c_1\hat{\alpha}_1 + c_2\hat{\alpha}_2 + \dots + c_w\hat{\alpha}_w$ . Thus, by using what we have already shown to be true for  $w = 2$ , we know that

$$SE(c_T\hat{\beta}_T + c_{w+1}\hat{\beta}_{w+1}) = \sqrt{c_T^2 SE(\hat{\beta}_T)^2 + c_{w+1}^2 SE(\hat{\beta}_{w+1})^2 + \frac{2}{n-2} \left( \frac{c_T * c_{w+1} * \text{cov}(\mathbf{y}_T, \mathbf{y}_{w+1})}{\text{var}(x)} - c_T \hat{\beta}_T c_{w+1} \hat{\beta}_{w+1} \right)}$$

We can now substitute for  $\hat{\beta}_T$  and  $\mathbf{y}_T$ .

$$SE(c_T\hat{\beta}_T + c_{w+1}\hat{\beta}_{w+1}) = \sqrt{\left(\sum_{i=1}^w c_i^2 SE(\hat{\beta}_i)^2\right) + \frac{2}{n-2} \left( \frac{\sum_{q=1}^{w-1} \sum_{r=q+1}^w c_q * c_r * \text{cov}(\mathbf{y}_q, \mathbf{y}_r)}{\text{var}(x)} - \left( \sum_{q=1}^{w-1} \sum_{r=q+1}^w c_q \hat{\beta}_q c_r \hat{\beta}_r \right) \right)} + c_{w+1}^2 SE(\hat{\beta}_{w+1})^2 + \frac{2}{n-2} \left( \frac{c_T * c_{w+1} * \text{cov}(\mathbf{y}_T, \mathbf{y}_{w+1})}{\text{var}(x)} - c_T \hat{\beta}_T c_{w+1} \hat{\beta}_{w+1} \right)$$

$$SE(c_T\hat{\beta}_T + c_{w+1}\hat{\beta}_{w+1}) = \sqrt{\left(\sum_{i=1}^w c_i^2 SE(\hat{\beta}_i)^2\right) + c_{w+1}^2 SE(\hat{\beta}_{w+1})^2 + \frac{2}{n-2} \left( \frac{(\sum_{q=1}^{w-1} \sum_{r=q+1}^w c_q * c_r * \text{cov}(\mathbf{y}_q, \mathbf{y}_r)) + \text{cov}(c_1\mathbf{y}_1 + \dots + c_w\mathbf{y}_w, c_{w+1}\mathbf{y}_{w+1})}{\text{var}(x)} - \left( \sum_{q=1}^{w-1} \sum_{r=q+1}^w c_q \hat{\beta}_q c_r \hat{\beta}_r \right) - (c_1\hat{\beta}_1 + \dots + c_w\hat{\beta}_w) c_{w+1} \hat{\beta}_{w+1} \right)}$$

We invoke the rule that states that  $\text{cov}(\mathbf{a} + \mathbf{b}, \mathbf{c}) = \text{cov}(\mathbf{a}, \mathbf{c}) + \text{cov}(\mathbf{b}, \mathbf{c})$  to proceed to the next step.

$$\begin{aligned} & \text{SE}(c_T \hat{\beta}_T + c_{w+1} \hat{\beta}_{w+1}) \\ &= \sqrt{\left( \sum_{i=1}^{w+1} c_i^2 \text{SE}(\hat{\beta}_i)^2 \right) + \frac{2}{n-2} \left( \frac{(\sum_{q=1}^{w-1} \sum_{r=q+1}^w c_q * c_r * \text{cov}(\mathbf{y}_q, \mathbf{y}_r)) + c_1 * c_{w+1} * \text{cov}(\mathbf{y}_1, \mathbf{y}_{w+1}) + \dots + c_w * c_{w+1} * \text{cov}(\mathbf{y}_w, \mathbf{y}_{w+1})}{\text{var}(x)} - \left( \sum_{q=1}^{w-1} \sum_{r=q+1}^w c_q \hat{\beta}_q c_r \hat{\beta}_r \right) - (c_1 \hat{\beta}_1 c_{w+1} \hat{\beta}_{w+1} + \dots + c_w \hat{\beta}_w c_{w+1} \hat{\beta}_{w+1}) \right)} \\ & \text{SE}(c_T \hat{\beta}_T + c_{w+1} \hat{\beta}_{w+1}) = \sqrt{\sum_{i=1}^{w+1} c_i^2 \text{SE}(\hat{\beta}_i)^2 + \frac{2}{n-2} \left( \frac{\sum_{q=1}^w \sum_{r=q+1}^{w+1} c_q * c_r * \text{cov}(\mathbf{y}_q, \mathbf{y}_r)}{\text{var}(x)} - \sum_{q=1}^w \sum_{r=q+1}^{w+1} c_q \hat{\beta}_q c_r \hat{\beta}_r \right)} \end{aligned}$$

Therefore, we have shown that

$$\text{SE}(c_1 \hat{\beta}_1 + c_2 \hat{\beta}_2 + \dots + c_w \hat{\beta}_w + c_{w+1} \hat{\beta}_{w+1}) = \sqrt{\left( \sum_{i=1}^{w+1} c_i^2 \text{SE}(\hat{\beta}_i)^2 \right) + \frac{2}{n-2} \left( \frac{\sum_{q=1}^w \sum_{r=q+1}^{w+1} c_q * c_r * \text{cov}(\mathbf{y}_q, \mathbf{y}_r)}{\text{var}(x)} - \left( \sum_{q=1}^w \sum_{r=q+1}^{w+1} c_q \hat{\beta}_q c_r \hat{\beta}_r \right) \right)} \quad \blacksquare$$

**Supplement 5:**

This table shows the results from selected SNP's of the slope from the omega index model, the slope from the omega index residual model, and the slope using our slope formula

| SNP        | Omega Index slope | Omega index residual model slope | Our slope estimate |
|------------|-------------------|----------------------------------|--------------------|
| rs2341541  | 0.128             | 0.129                            | 0.129              |
| rs33916140 | 0.130             | 0.131                            | 0.131              |
| rs10202153 | 0.146             | 0.149                            | 0.149              |
| rs7301020  | 0.206             | 0.208                            | 0.208              |
| rs7304591  | 0.202             | 0.204                            | 0.204              |
| rs10497426 | 0.177             | 0.181                            | 0.181              |
| rs1319458  | 0.129             | 0.131                            | 0.131              |
| rs651134   | 0.324             | 0.332                            | 0.332              |
| rs988550   | 0.126             | 0.127                            | 0.127              |
| rs8099359  | 0.146             | 0.149                            | 0.149              |

**Supplement 6:**

This table shows the results from selected SNP's for the omega index model standard error, the omega index residual model standard error, the standard error calculated using the formula presented in this paper, the standard error using the formula and estimating the covariance of the phenotypes, the standard error using the formula and estimating the covariance of the phenotypes and the variance of the genotype, and the Hardy-Weinberg Equilibrium of the given SNP.

| SNP        | Omega3 Index standard error | Omega3 Index Residual model Standard error | Standard error using formula | Standard error estimating covariance of y's | Standard error estimating covariance of y's and variance of genotype | Hardy-Weinberg Equilibrium P-value |
|------------|-----------------------------|--------------------------------------------|------------------------------|---------------------------------------------|----------------------------------------------------------------------|------------------------------------|
| rs2341541  | 0.0291                      | 0.0295                                     | 0.0295                       | 0.0297                                      | 0.0297                                                               | 0.806354                           |
| rs33916140 | 0.0292                      | 0.0296                                     | 0.0296                       | 0.0297                                      | 0.0297                                                               | 0.762948                           |
| rs10202153 | 0.0347                      | 0.0352                                     | 0.0352                       | 0.0354                                      | 0.0356                                                               | 0.059301                           |
| rs7301020  | 0.0484                      | 0.0490                                     | 0.0490                       | 0.0493                                      | 0.0489                                                               | 0.029949                           |



|            |        |        |        |        |        |          |
|------------|--------|--------|--------|--------|--------|----------|
| rs7304591  | 0.0485 | 0.0492 | 0.0493 | 0.0496 | 0.0493 | 0.092214 |
| rs10497426 | 0.0359 | 0.0363 | 0.0364 | 0.0366 | 0.0370 | 0.00237  |
| rs1319458  | 0.0287 | 0.0291 | 0.0291 | 0.0292 | 0.0293 | 0.225632 |
| rs651134   | 0.0729 | 0.0739 | 0.0739 | 0.0743 | 0.0746 | 0.190229 |
| rs988550   | 0.0286 | 0.0290 | 0.0290 | 0.0292 | 0.0293 | 0.185446 |
| rs8099359  | 0.0340 | 0.0344 | 0.0344 | 0.0346 | 0.0347 | 0.277974 |

### Supplement 7:

This shows the results from selected SNP's of the omega index model p-value, the omega index residual model p-value, the p-value estimate using the standard error formula and the estimated covariance of the phenotypes, and the p-value estimate with the estimated covariance of phenotypes and estimated variance of genotype.

| SNP        | Omega3 index p-value | Omega3 index residual model p-value | P-value estimate for estimated covariance of y's | P-value estimate for estimated covariance of y's and variance of genotype |
|------------|----------------------|-------------------------------------|--------------------------------------------------|---------------------------------------------------------------------------|
| rs2341541  | 1.17E-05             | 1.29E-05                            | 1.44E-05                                         | 1.42E-05                                                                  |
| rs33916140 | 8.55E-06             | 9.32E-06                            | 1.04E-05                                         | 1.02E-05                                                                  |
| rs10202153 | 2.76E-05             | 2.27E-05                            | 2.52E-05                                         | 2.82E-05                                                                  |
| rs7301020  | 2.08E-05             | 2.32E-05                            | 2.57E-05                                         | 2.26E-05                                                                  |
| rs7304591  | 3.22E-05             | 3.67E-05                            | 4.05E-05                                         | 3.68E-05                                                                  |
| rs10497426 | 8.34E-07             | 7.37E-07                            | 8.46E-07                                         | 1.08E-06                                                                  |
| rs1319458  | 6.80E-06             | 7.10E-06                            | 7.96E-06                                         | 8.63E-06                                                                  |
| rs651134   | 9.49E-06             | 7.60E-06                            | 8.52E-06                                         | 9.29E-06                                                                  |
| rs988550   | 1.13E-05             | 1.30E-05                            | 1.45E-05                                         | 1.58E-05                                                                  |
| rs8099359  | 1.89E-05             | 1.54E-05                            | 1.71E-05                                         | 1.83E-05                                                                  |
